# Supplementary material for: Co(O)x Particles in Polymeric N-Doped Carbon Nanotube Applied for Photocatalytic H2 or Electrocatalytic O2 Evolution
Source: MDPI journal article supplement (doi:10.3390/polym11111836), 2019-11-07
Supplement: s1 [file s1]

Article

# Co(O)<sub>x</sub> Particles in Polymeric N-doped Carbon Nanotube Applied for Photocatalytic H<sub>2</sub> or Electrocatalytic O<sub>2</sub> Evolution

Xiaoxue Zheng †, Ke Liu †, Lichao Chen, Hengxiao He, Lusheng Chen \* and Chuanzhi Sun \*

College of Chemistry, Chemical Engineering and Materials Science, Collaborative Innovation Center of Functionalized Probes for Chemical Imaging in Universities of Shandong, Shandong Provincial Key Laboratory of Clean Production of Fine Chemicals, Institute of Materials and Clean Energy, Shandong Normal University, Jinan 250014, China

† These two authors contributed equally to this work.

\* Correspondence: suncz@sdu.edu.cn

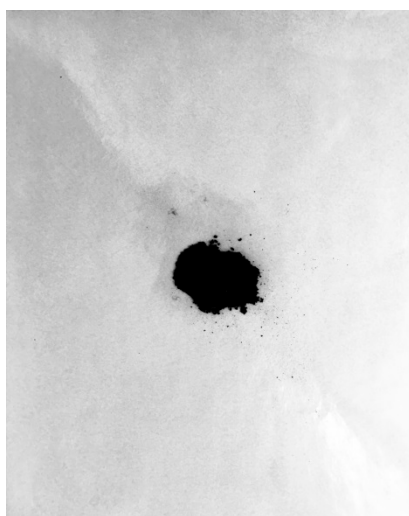

**Figure S1.** The picture of CoO<sub>x</sub>-NDCNTs sample.

**Table S1.** The elemental analysis of different samples.

| Samples                         | C (%) | N (%) |
|---------------------------------|-------|-------|
| g-C <sub>3</sub> N <sub>4</sub> | 34.14 | 60.04 |
| CoO <sub>x</sub> -NDCNTs        | 78.75 | 17.55 |
| Co-NDCNTs                       | 92.66 | 6.56  |

## The external quantum efficiency (EQE) test

The external quantum efficiency (EQE) tests were performed in a 20 ml quartz bottle with rubber septum. 10 mg sample was dispersed in aqueous solution (10 ml) containing 20 vol% TEOA. This system was evacuated and bubbled Ar for 10 min to remove the residual gas. Then, the photocatalytic system was irradiated with 300 W Xe arc lamp with a set of band-pass filters (= 405 nm, 420 nm, 450 nm, 500 nm and 650 nm) under magnetic stirring, the irradiation intensities were determined by a NOVA II laser power meter (Ophir Photonics).

**Table S2.** EQE value calculated at different wavelengths.

| <b>Wavelength</b> | <b>H<sub>2</sub> Evolved<br/>(<math>\mu\text{mol}</math>)</b> | <b>Light Intensity<br/>(W)</b> | <b>EQE</b> |
|-------------------|---------------------------------------------------------------|--------------------------------|------------|
| 405 nm            | 51.47                                                         | 0.090                          | 1.83%      |
| 420 nm            | 35.91                                                         | 0.087                          | 1.28%      |
| 450 nm            | 23.06                                                         | 0.085                          | 0.78%      |
| 500 nm            | 14.87                                                         | 0.082                          | 0.47%      |
| 650 nm            | 0.09                                                          | —                              | —          |
